# Supplementary material for: Novel Immune-Related Genetic Expression for Primary Sjögren's Syndrome
Source: Front Med (Lausanne). 2022 Jan 3;8:719958. doi: 10.3389/fmed.2021.719958 (PMC8761677; doi:10.3389/fmed.2021.719958)
Supplement: Supplementary file 1 [file Table_1.XLSX]

## Sheet: Sheet1
ID	Description	GeneRatio	BgRatio	pvalue	p.adjust	qvalue	geneID	Count
hsa05171	Coronavirus disease - COVID-19	23/159	232/8105	1.07881e-10	2.0821e-08	1.78287e-08	TBK1/RPL22L1/RPL26L1/CHUK/IFIH1/CXCL10/RPS27L/RSL24D1/OAS1/ISG15/RPS7/RPS17/RPL39/RPL9/DDX58/EIF2AK2/C1QB/OAS2/OAS3/RPL34/RPL31/CCL2/MX1	23
hsa03010	Ribosome	16/159	158/8105	6.72845e-08	6.49295e-06	5.55982e-06	MRPL15/MRPL22/RPL22L1/RPL26L1/MRPL3/MRPL13/RPS27L/RSL24D1/MRPL1/RPS7/RPS17/RPL39/RPL9/MRPL32/RPL34/RPL31	16
hsa05164	Influenza A	16/159	172/8105	2.20681e-07	1.41971e-05	1.21568e-05	JAK2/TBK1/TNFSF10/CHUK/CASP3/IFIH1/CXCL10/OAS1/RSAD2/DDX58/IRF7/EIF2AK2/OAS2/OAS3/CCL2/MX1	16
hsa04621	NOD-like receptor signaling pathway	15/159	181/8105	2.35362e-06	0.000113562	9.72417e-05	TBK1/ATG5/BIRC3/CHUK/AIM2/GBP3/OAS1/IRF7/GBP1/OAS2/GBP5/OAS3/CCL2/GBP4/CASP5	15
hsa04622	RIG-I-like receptor signaling pathway	9/159	70/8105	8.02043e-06	0.000309589	0.000265096	AZI2/TBK1/ATG5/CHUK/IFIH1/CXCL10/ISG15/DDX58/IRF7	9
hsa05160	Hepatitis C	13/159	157/8105	1.15465e-05	0.000371413	0.000318035	TBK1/CHUK/CASP3/CXCL10/IFIT1/OAS1/RSAD2/DDX58/IRF7/EIF2AK2/OAS2/OAS3/MX1	13
hsa04623	Cytosolic DNA-sensing pathway	8/159	63/8105	2.85051e-05	0.000785926	0.000672977	TBK1/POLR2K/CHUK/AIM2/CXCL10/DDX58/IRF7/ZBP1	8
hsa05162	Measles	11/159	139/8105	8.42559e-05	0.00203267	0.00174055	TBK1/CHUK/CASP3/IFIH1/OAS1/DDX58/IRF7/EIF2AK2/OAS2/OAS3/MX1	11
hsa05169	Epstein-Barr virus infection	13/159	202/8105	0.000160388	0.00343944	0.00294514	TBK1/CD58/CHUK/CASP3/PSMC6/CXCL10/OAS1/ISG15/DDX58/IRF7/EIF2AK2/OAS2/OAS3	13
hsa05168	Herpes simplex virus 1 infection	21/159	498/8105	0.000693223	0.0133792	0.0114564	JAK2/TBK1/ZNF184/ZNF140/BIRC3/CHUK/ZNF222/ZNF684/CASP3/IFIH1/OAS1/ZNF267/BST2/ZNF302/DDX58/IRF7/EIF2AK2/ZNF708/OAS2/OAS3/CCL2	21
hsa05020	Prion disease	14/159	273/8105	0.000915846	0.0160689	0.0137596	UQCRQ/PSMA2/ATP5F1C/COX7A2/NDUFA4/PSMA4/CASP3/PSMC6/NDUFB3/COX7B/COX7C/ATP5PF/C1QB/COX6C	14
hsa00190	Oxidative phosphorylation	9/159	133/8105	0.00117335	0.0176115	0.0150805	UQCRQ/ATP5F1C/COX7A2/NDUFA4/NDUFB3/COX7B/COX7C/ATP5PF/COX6C	9
hsa05012	Parkinson disease	13/159	249/8105	0.00118627	0.0176115	0.0150805	UQCRQ/PSMA2/ATP5F1C/COX7A2/NDUFA4/PSMA4/CASP3/PSMC6/NDUFB3/COX7B/COX7C/ATP5PF/COX6C	13
hsa04668	TNF signaling pathway	8/159	112/8105	0.00155589	0.0214491	0.0183665	IL15/BIRC3/CHUK/CASP3/CXCL10/PTGS2/CCL2/IL18R1	8
hsa05222	Small cell lung cancer	7/159	92/8105	0.00212521	0.0272875	0.0233659	CKS1B/CKS2/BIRC3/CHUK/CASP3/ITGAV/PTGS2	7
hsa05010	Alzheimer disease	16/159	369/8105	0.00233154	0.0272875	0.0233659	UQCRQ/PSMA2/ATP5F1C/COX7A2/NDUFA4/CHUK/PSMA4/CASP3/PSMC6/NDUFB3/COX7B/COX7C/ATP5PF/EIF2AK2/COX6C/PTGS2	16
hsa04657	IL-17 signaling pathway	7/159	94/8105	0.00240356	0.0272875	0.0233659	TBK1/CHUK/CASP3/CXCL10/S100A8/PTGS2/CCL2	7
hsa04672	Intestinal immune network for IgA production	5/159	49/8105	0.00259319	0.0273043	0.0233803	IL15/TNFSF13B/ICOS/ITGA4/TNFRSF17	5
hsa05016	Huntington disease	14/159	306/8105	0.00268799	0.0273043	0.0233803	UQCRQ/PSMA2/ATP5F1C/COX7A2/POLR2K/NDUFA4/PSMA4/CASP3/PSMC6/NDUFB3/COX7B/COX7C/ATP5PF/COX6C	14
hsa04064	NF-kappa B signaling pathway	7/159	104/8105	0.00423997	0.0409158	0.0350356	BIRC3/TNFSF13B/CHUK/BCL2A1/LY96/DDX58/PTGS2	7
hsa05014	Amyotrophic lateral sclerosis	15/159	364/8105	0.00511653	0.0455352	0.0389911	UQCRQ/TBK1/PSMA2/ATP5F1C/COX7A2/NDUFA4/C9orf72/PSMA4/CASP3/PSMC6/NDUFB3/COX7B/COX7C/ATP5PF/COX6C	15
hsa04210	Apoptosis	8/159	136/8105	0.00519054	0.0455352	0.0389911	TNFSF10/BIRC3/PMAIP1/CHUK/CASP3/BCL2A1/CTSL/LMNB1	8
hsa04978	Mineral absorption	5/159	59/8105	0.00582133	0.0488485	0.0418283	MT1E/MT1X/MT1HL1/MT2A/MT1H	5
